# Supplementary material for: Reaction-based machine learning representations for predicting the enantioselectivity of organocatalysts
Source: Royal Society of Chemistry journal article supplement (doi:10.1039/d1sc00482d), 2021-01-01
Supplement: d1sc00482d1.pdf [file d1sc00482d1.pdf]

## Supporting Information for

# Reaction-Based Machine Learning Representations for Predicting the Enantioselectivity of Organocatalysts

Simone Gallarati,<sup>a,+</sup> Raimon Fabregat,<sup>a,+</sup> Rubén Laplaza,<sup>a,b</sup> Sinjini Bhattacharjee,<sup>a,c</sup> Matthew D. Wodrich<sup>a</sup> and Clemence Corminboeuf<sup>a,b,d,\*</sup>

<sup>a</sup>Laboratory for Computational Molecular Design, Institute of Chemical Sciences and Engineering, Ecole Polytechnique Fédérale de Lausanne (EPFL), 1015 Lausanne, Switzerland

<sup>b</sup>National Center for Competence in Research – Catalysis (NCCR-Catalysis), Ecole Polytechnique Fédérale de Lausanne (EPFL), 1015 Lausanne, Switzerland

<sup>c</sup>Indian Institute of Science Education and Research, Dr Homi Bhabha Rd, Ward No. 8, NCL Colony, Pashan, Pune, Maharashtra 411008, India

<sup>d</sup>National Center for Computational Design and Discovery of Novel Materials (MARVEL), Ecole Polytechnique Fédérale de Lausanne (EPFL), 1015 Lausanne, Switzerland

\*Email: [clemence.corminboeuf@epfl.ch](mailto:clemence.corminboeuf@epfl.ch)

<sup>+</sup>These authors contributed equally to this work.

## Contents

|                                                                 |   |
|-----------------------------------------------------------------|---|
| 1. Ligand Configurations for Boltzmann Weighting                | 1 |
| 2. Learning Curves                                              | 2 |
| 3. Feature Importances                                          | 2 |
| 4. Hyperparameters                                              | 3 |
| 5. Predicted <i>e.e.</i> Values                                 | 4 |
| 6. Out-of-sample Predictions with Retrained Model               | 5 |
| 7. DFT Optimised XYZ Structures and Energies                    | 6 |
| 8. Out-Of-Sample Machine Learning Predicted Activation Energies | 6 |

## 1. Ligand Configurations for Boltzmann Weighting

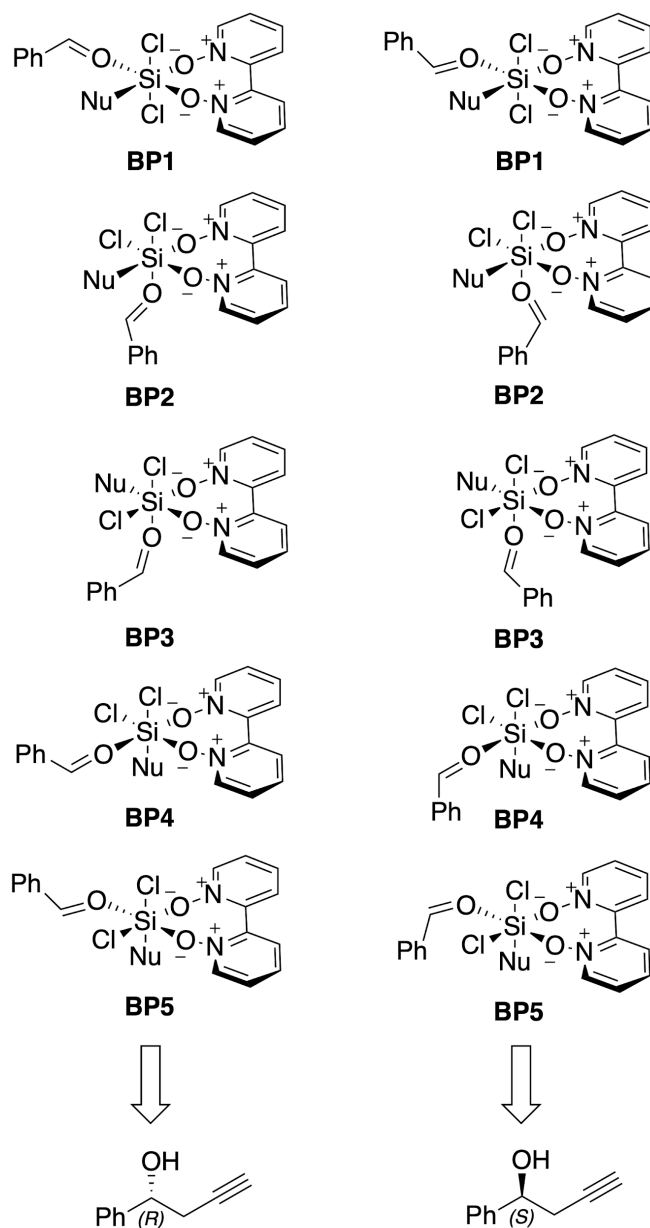

**Figure S1.** 10 distinct ligand arrangements leading to the (*R*)- or (*S*)-propargyl alcohol for  $C_2$ -symmetric bidentate Lewis-based catalysed propargylation reactions. Nu = alkyl nucleophile. For each ligand configuration **BP1–5**, the alkyl nucleophile can add to either face of benzaldehyde, yielding 10 possible diastereomeric TSs ((*R*)- or (*S*)-).

## 2. Learning Curves

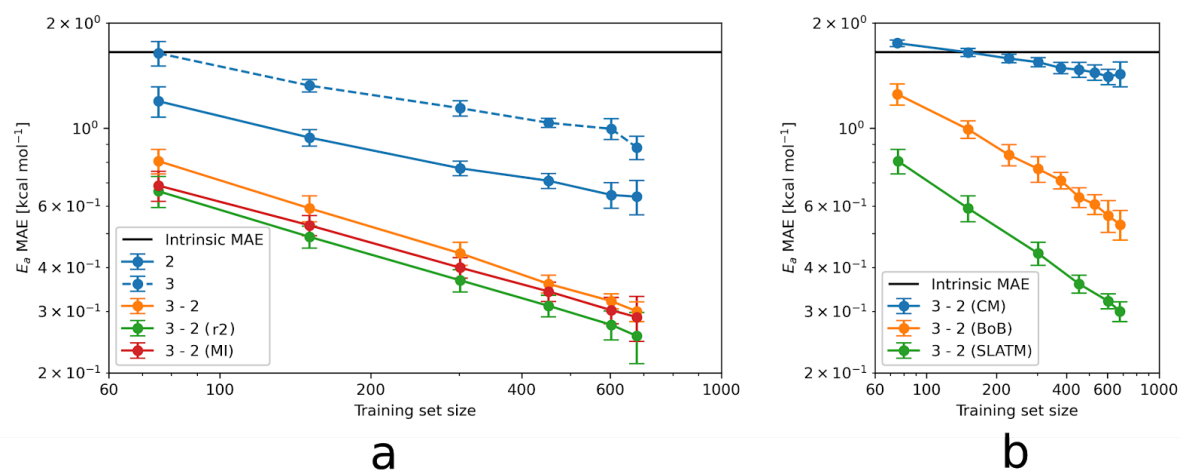

**Figure S2.** Learning curves for the different molecular representations used. **a)** Curves correspond to the SLATM representations of **3** and **2** (dashed and solid blue, respectively), **3 – 2** (orange), **3 – 2** with 500 features selected using Mutual Information importances (red), and **3 – 2** with 500 features selected using  $r^2$  linear regression coefficients (green). **b)** Curves correspond to the learning curves of **3 – 2** using different standard atomistic ML representations: Coulomb Matrix (blue), Bag of Bonds (orange), and SLATM (green).

## 3. Feature Importances

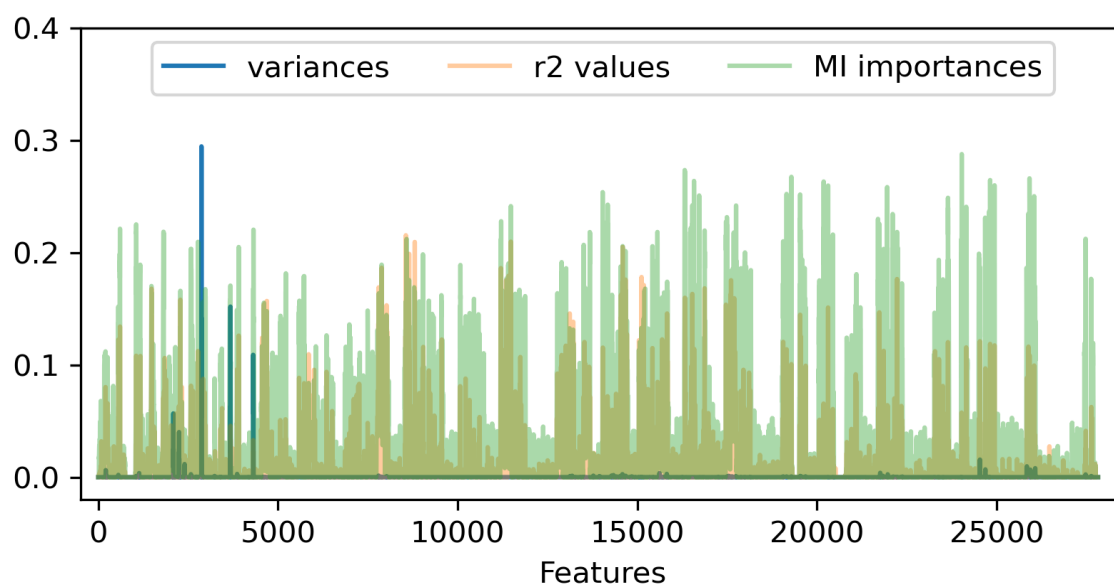

**Figure S3.** Feature importances of the SLATM<sub>DIFF</sub> representations of the dataset, computed using: (blue) the variance, (orange) the  $r^2$  linear regression coefficient, and (green) the Mutual Information.

## 4. Hyperparameters

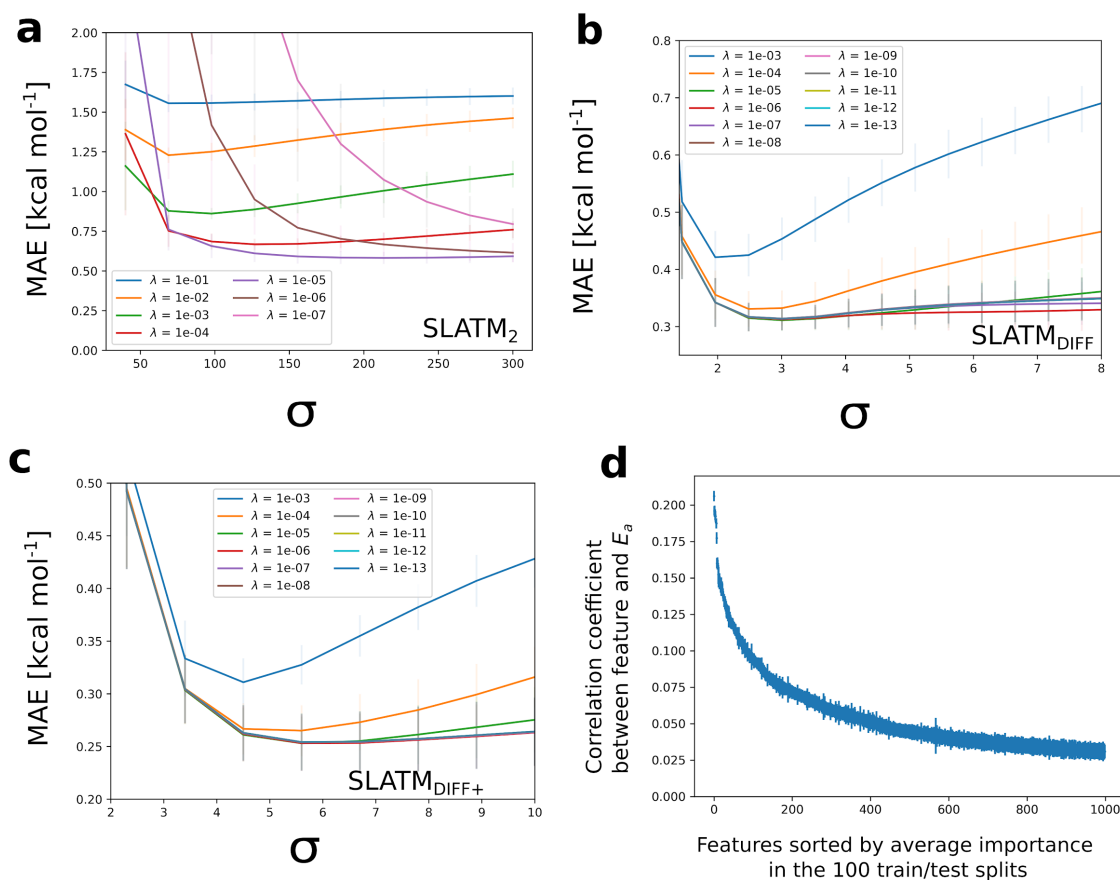

**Figure S4.** a-c) Average hyperparameter fitting curves for the 100 train/test splits. The error bars are calculated with the standard deviation in the 100 splits. d) Importances of features sorted by the average feature importance in the 100 train/test splits. The error bars are computed using the standard deviation in the feature importance for the 100 splits.

**Table S1.** Optimised hyperparameters, obtained through grid-search optimisation, of the ML model for each of the representations discussed in the main text.  $\sigma$  controls kernel width and  $\lambda$  is the ridge parameter for regularization.

|                        | $\sigma$ | $\lambda$          |
|------------------------|----------|--------------------|
| SLATM <sub>2</sub>     | 180      | $1 \times 10^{-5}$ |
| SLATM <sub>DIFF</sub>  | 1.5      | $1 \times 10^{-6}$ |
| SLATM <sub>DIFF+</sub> | 1.5      | $1 \times 10^{-6}$ |

## 5. Predicted *e.e.* Values

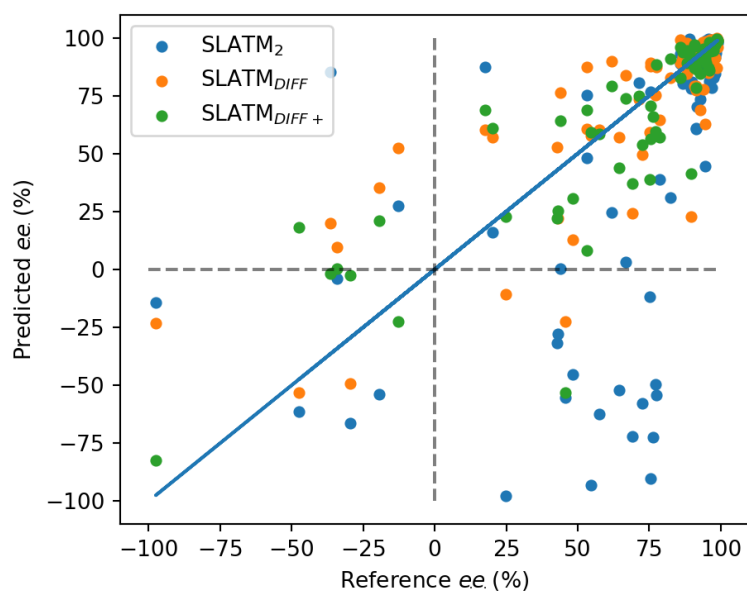

**Figure S5.** ML-predicted vs. reference DFT *e.e.* values for the 76 catalysts using each of the three different approaches discussed in the main text: SLATM<sub>2</sub> (blue), SLATM<sub>DIFF</sub> (orange) and SLATM<sub>DIFF+</sub> (green). Most of the points are hidden by the overlaps at the 100/100 region. Data corresponds to [Figure 3](#) of the main text and details on their generation are given in the machine learning section.

## 6. Out-of-sample Predictions with Retrained Model

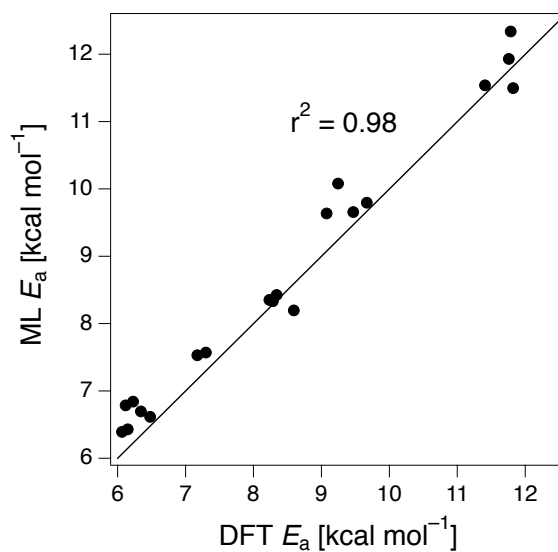

**Figure S6.** ML-predicted *vs.* reference DFT  $E_a$  values of out-of-sample catalysts **7j** and **7k**. The ML model was re-trained on all of the 754 data points, without splitting them into the 90/10 train/test sets, using the same hyperparameters previously obtained in the cross-validation training. The features of SLATM<sub>DIFF+</sub> were also selected using the full dataset (754 points), but they did not vary from those selected in the previous cross-validation splits.

## 7. DFT Optimised XYZ Structures and Energies

The structures of the 1508 catalytic cycle intermediates, optimised at the PCM<sub>DCM</sub>/B97-D/TZV(2p,2d) level, are provided in the folders *DFTgeomInt2* and *DFTgeomInt3*. The absolute energies (in atomic units) of intermediates **2**, **3**, and of the enantiodetermining TSs are provided in *DFTenergies.csv*. The ML-predicted relative  $E_a$  values for each species, in kcal mol<sup>-1</sup>, using the three representations discussed in the main text, are provided in *ActivationEnergiesPredictions.csv*.

Note that all our data (optimised structures, energies, ML predictions) can be found in the Materials Cloud.

## 8. Out-Of-Sample Machine Learning Predicted Activation Energies

The ML-predicted and DFT-computed activation energies of the out-of-sample catalysts **7j** and **7k** with the SLATM<sub>DIFF+</sub> representation are given in the *OOSPredictions.csv* file, while the geometries of catalytic cycle intermediates **2** and **3** and of the enantiodetermining transition states are given in the folders *DFTgeomOOSInt2*, *DFTgeomOOSInt3* and *DFTgeomOOSTS*.
